# Supplementary material for: Cabozantinib versus everolimus, nivolumab, axitinib, sorafenib and best supportive care: A network meta-analysis of progression-free survival and overall survival in second line treatment of advanced renal cell carcinoma
Source: PLoS One. 2017 Sep 8;12(9):e0184423. doi: 10.1371/journal.pone.0184423 (PMC5590935; doi:10.1371/journal.pone.0184423)
Supplement: S6 File — (DOCX) [file pone.0184423.s006.docx]

### Transitivity Property

1. **Description of the transitivity property for each survival distribution**

Weibull distribution. The hazard function is

This can be written as

, with .

Transitivity of log HR at time t can be proven as

)

)

Exponential distribution. The hazard function is

This can be written as

, with

Transitivity of log HR at time t can be proven as

Gompertz distribution. The hazard function is

This can be written as

, with .

Transitivity of log HR at time t can be proven as

)

)

Log-logistic distribution. The failure odds in a log-logistic model (Poyston and Parmar, 2002) is

This can be written as

, with

Transitivity of log-odds ratio at time t can be proven as

)

)

Log-normal distribution. The survival function is

, with the cumulative distribution function of the standard normal distribution.

This can be written as

, with

Transitivity of relative treatment effect at time t can be proven as

)

)

*NMA method - details*

With a fixed-effects model for network meta-analysis, it was assumed that there was no variation in the treatment effect between studies. As presented in Ouwens et al. (2010), the model was defined as follows:

(1)

In this formula, represents the underlying hazard rate in study for treatment at time point . The vectors are treatment-specific and reflect the parameters and of the “baseline” treatment in study . In our case study, everolimus was the “baseline” treatment in METEOR, CheckMate025, and RECORD-1; placebo was the “baseline” treatment in TARGET and sorafenib was the “baseline” treatment in AXIS. The vector reflects the study-specific difference in scale and shape of the log-hazard curve for treatment relative to the “baseline” treatment in study . In our case study, treatment corresponded to cabozantinib in METEOR, nivolumab in CheckMate025, placebo in RECORD-1, sorafenib in TARGET and axitinib in AXIS.

Estimation of model parameters of interest – baseline and effect vectors – was performed in Bayesian framework. The prior distributions as used for the parameters of the fixed-effects model were chosen non-informative as follows:
