# Supplementary material for: Cabozantinib versus everolimus, nivolumab, axitinib, sorafenib and best supportive care: A network meta-analysis of progression-free survival and overall survival in second line treatment of advanced renal cell carcinoma
Source: PLoS One. 2017 Sep 8;12(9):e0184423. doi: 10.1371/journal.pone.0184423 (PMC5590935; doi:10.1371/journal.pone.0184423)
Supplement: S8 File — (DOCX) [file pone.0184423.s008.docx]

### Goodness-of-fit

1. **Goodness-of-fit**

The goodness-of-fit of the model prediction to the observed individual patient data (IPD) was measured by computing the posterior mean residual deviance, [33]. The deviance information criterion () was used to compare different models and provided a measure of model fit that penalized model complexity according to Spiegelhalter et al. (2002) [29]:

is the effective number of parameters and is the deviance evaluated at the posterior mean of the model parameters. The model with the lowest provided the best data fit. The model fits were visually inspected against original published KM curves.

Model fit statistics are presented in Table 3 and Table 4, for OS and PFS respectively. In both cases, the log-normal fixed-effects model provided the best model fit with the lowest DIC.
